# Supplementary material for: Blood-stage malaria parasites manipulate host innate immune responses through the induction of sFGL2
Source: PubMed Central journal article supplement — Sci Adv. 2020 Feb 26;6(9):eaay9269. doi: 10.1126/sciadv.aay9269 (PMC7043914; doi:10.1126/sciadv.aay9269), 2020-02-26
Supplement: aay9269_SM.pdf [file aay9269_SM.pdf]

## Supplementary Materials for

### **Blood-stage malaria parasites manipulate host innate immune responses through the induction of sFGL2**

Yong Fu, Yan Ding, Qinghui Wang, Feng Zhu, Yulong Tan, Xiao Lu, Bo Guo, Qingfeng Zhang, Yaming Cao, Taiping Liu\*, Liwang Cui\*, Wenyue Xu\*

\*Corresponding author. Email: xuwenyue@tmmu.edu.cn (W.X.); liwangcui@usf.edu (L.C.); liutaiping@tmmu.edu.cn (T.L.)

Published 26 February 2020, *Sci. Adv.* **6**, eaay9269 (2020)  
DOI: 10.1126/sciadv.aay9269

#### **This PDF file includes:**

Fig. S1. FGL2 deficiency has no significant effect on both fibrin deposition in the spleen and coagulation function of the parasite-infected mice.

Fig. S2. sFGL2 has no effect on parasite-specific antibody production.

Fig. S3. sFGL2 has no effect on parasite-specific CD4<sup>+</sup> T cell activation.

Fig. S4. sFGL2 has no effect on parasite-specific CD8<sup>+</sup> T cell activation.

Fig. S5. Full blots of the effect of rFGL2 administration on both mitogen-activated protein kinase and NF- $\kappa$ B activity in *P. chabaudi* lysate-stimulated macrophages by rFGL2.

Fig. S6. Full blots of the Fc $\gamma$ RIIB-dependent inhibition of JNK in *P. chabaudi* lysate-activated macrophages by sFGL2.

Fig. S7. Full blots of the inhibition of JNK in *P. falciparum* lysate-activated macrophages by rFGL2.

Table S1. Detailed information of patients with malaria.

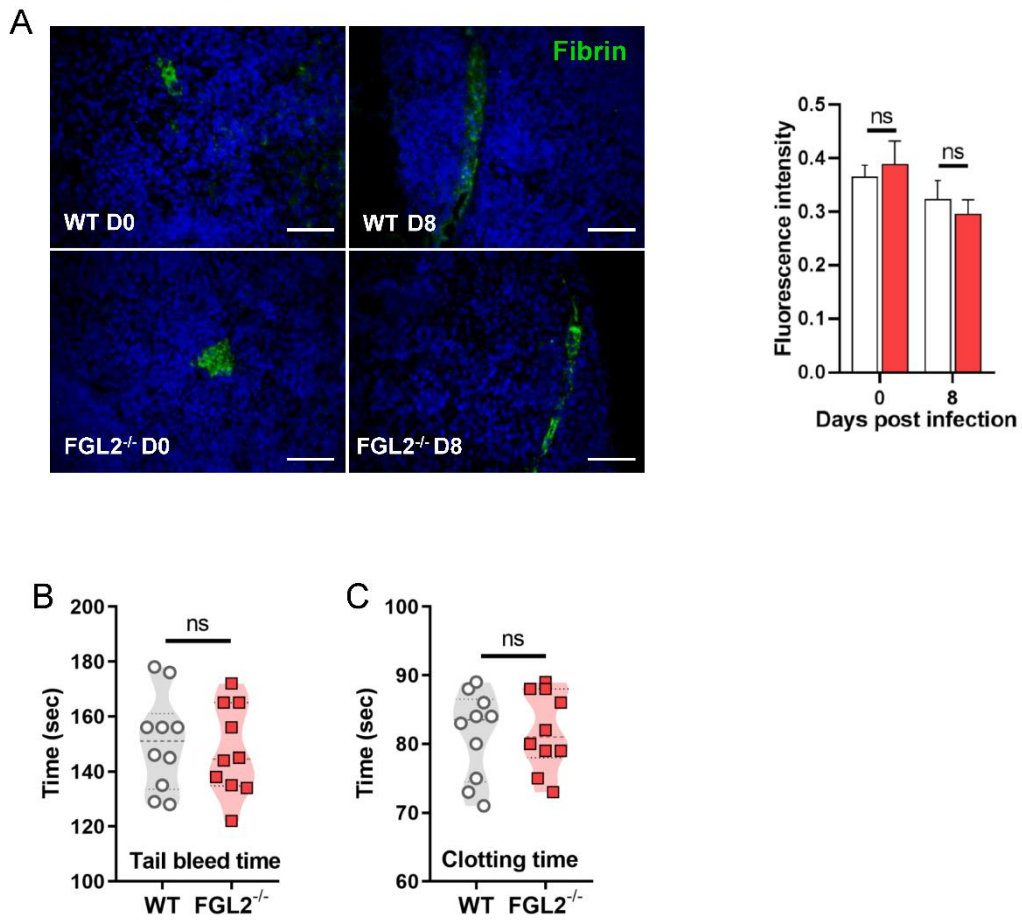

**Fig. S1. FGL2 deficiency has no significant effect on both fibrin deposition in the spleen and coagulation function of the parasite-infected mice. (A)** Immunofluorescence assay of fibrin deposition (green) in the spleens of WT and FGL2<sup>-/-</sup> mice at 8 days post-infection with *P. chabaudi* (left); the intensity of fibrin was statistically analyzed (right). **(B)** Tail bleed time (right) and clotting time (left) between WT and FGL2<sup>-/-</sup> mice at 8 days post-infection with *P. chabaudi*. Data are pooled from three independent experiments with at least five mice per group and represent mean  $\pm$  SD. ns, not significant.

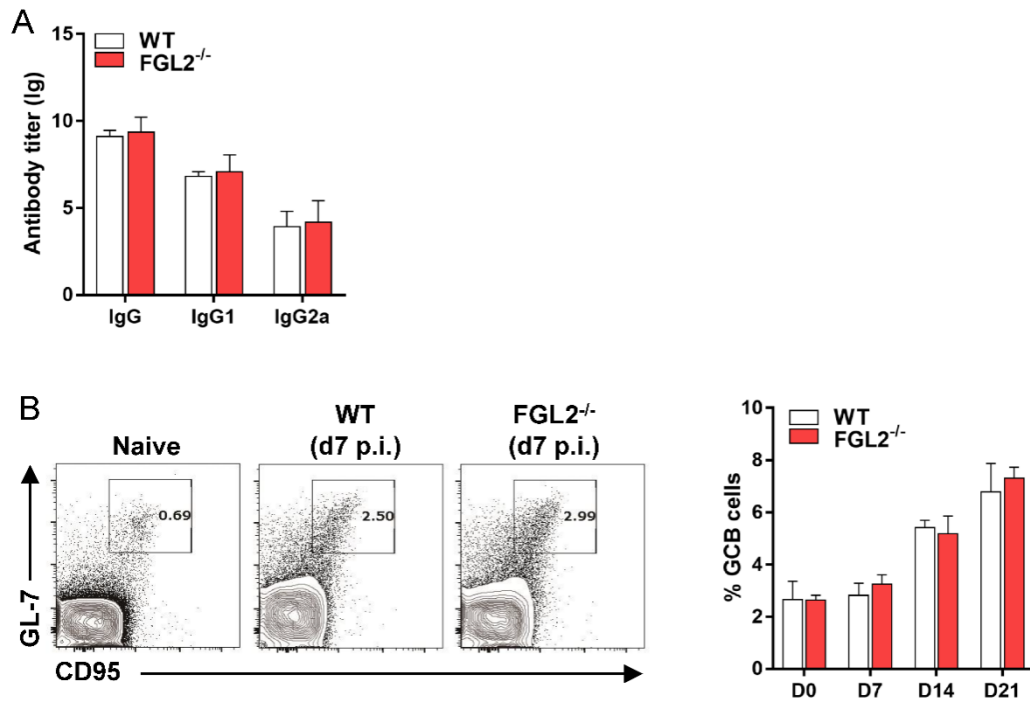

**Fig. S2. sFGL2 has no effect on parasite-specific antibody production. (A)** The levels of malaria parasite-specific total IgG, IgG1 and IgG2a in the serum of WT and FGL2<sup>-/-</sup> mice were detected by ELISA at 7 days post-infection with *P. chabaudi*. **(B)** The representative result of GC B cells (B220<sup>+</sup>CD95<sup>+</sup>GL7<sup>+</sup>) in spleen of WT and FGL2<sup>-/-</sup> mice at the indicated time points post-infection with *P. chabaudi* by flow cytometry (*left*), and the difference of GC B cells level between WT and FGL2<sup>-/-</sup> mice was statistically analyzed (*right*). Data are pooled from three independent experiments with five mice per group and represent as mean  $\pm$  SD.

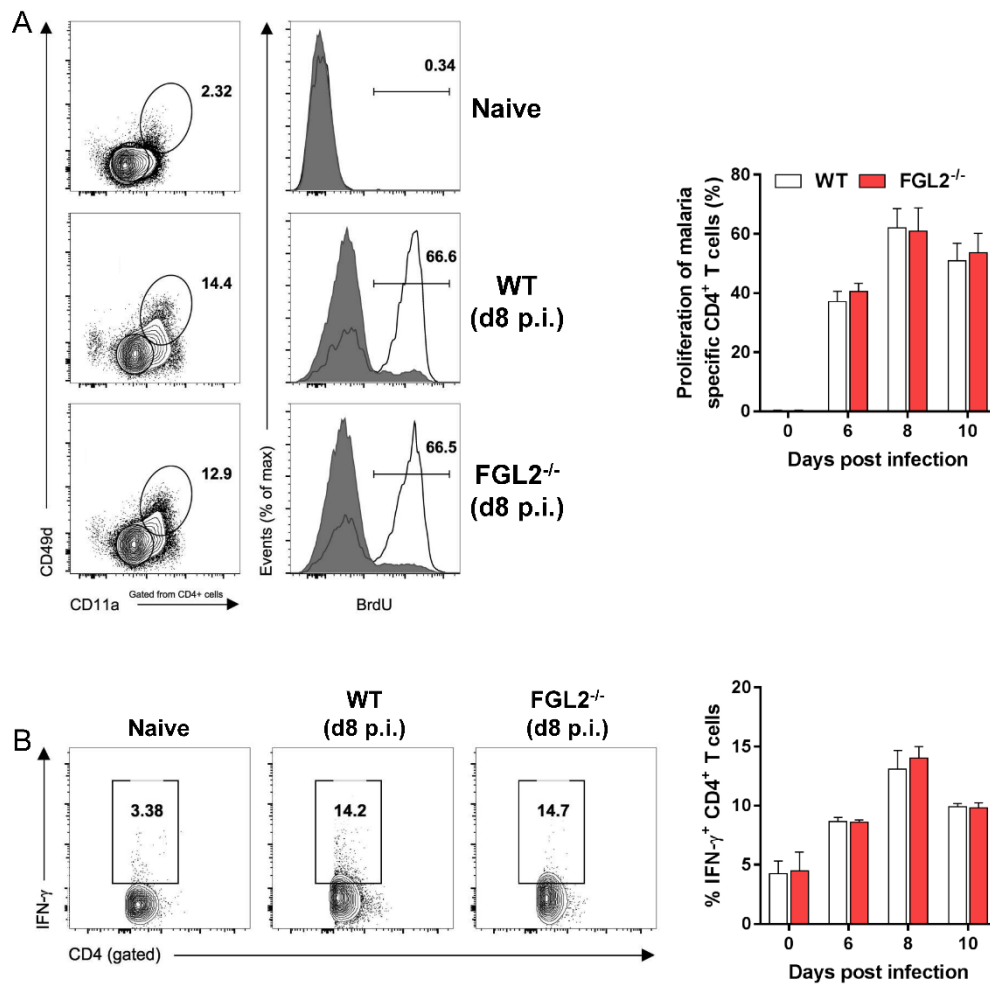

**Fig. S3. sFGL2 has no effect on parasite-specific CD4<sup>+</sup> T cell activation.** (A) The representative FACS analysis of (upper) and the statistical analysis (bottom) of the proliferation of parasite-specific CD4<sup>+</sup> (CD4<sup>+</sup>CD49d<sup>high</sup>CD11a<sup>high</sup>) in spleen of WT and FGL2<sup>-/-</sup> mice at the indicated time points post-infection with *P.chabaudi*. (B) The representative FACS analysis (left) and statistical analysis (right) of IFN- $\gamma$  production of malaria parasite-specific CD4<sup>+</sup> T cells in spleen of WT and FGL2<sup>-/-</sup> mice at the indicated time points post-infection with *P.chabaudi*. Data represent three separate experiments with at least three mice per group and represent the mean  $\pm$  SD.

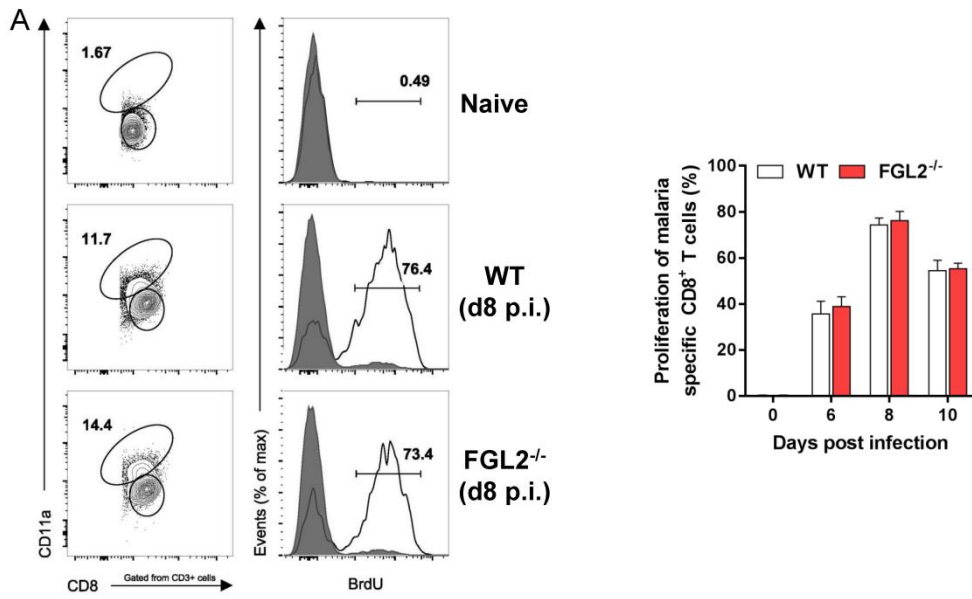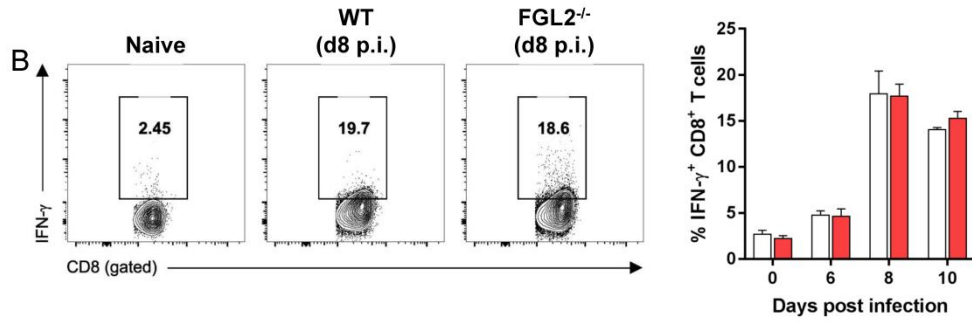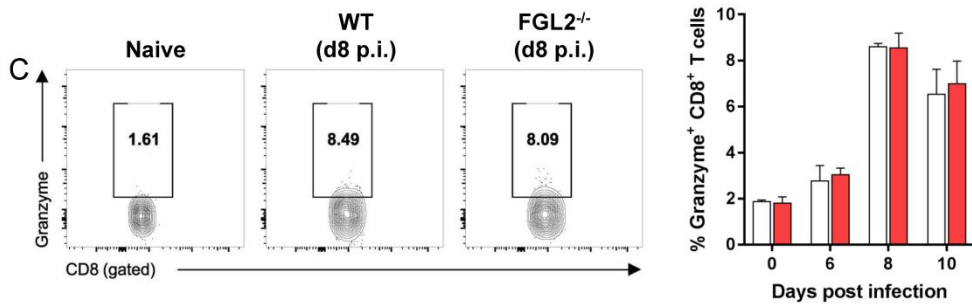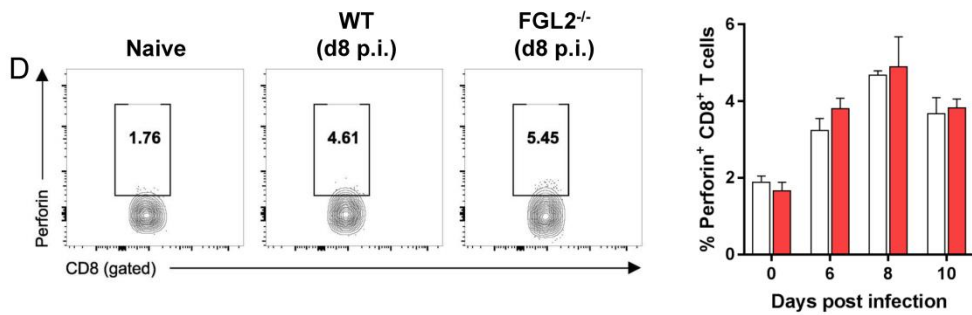

**Fig. S4. sFGL2 has no effect on parasite-specific CD8<sup>+</sup> T cell activation. (A)** The representative FACS analysis (*left*) and statistical analysis (*right*) of the proliferation of parasite-specific CD8<sup>+</sup> (CD8a<sup>low</sup>CD11a<sup>high</sup>). **(B)** The representative FACS analysis (*left*) and statistical analysis (*right*) of IFN- $\gamma$  production of malaria parasite-specific CD8<sup>+</sup> T cells in spleen of WT and FGL2<sup>-/-</sup> mice at the indicated time points post-infection with *P.chabaudi*. **(C)** The representative FACS analysis (*left*) and statistical analysis (*right*) of Granzyme B production of malaria parasite-specific CD8<sup>+</sup> T cells in spleen of WT and FGL2<sup>-/-</sup> mice post-infection. **(D)** The representative FACS analysis (*left*) and statistical analysis (*right*) of perforin production of malaria parasite-specific CD8<sup>+</sup> T cells in spleen of WT and FGL2<sup>-/-</sup> mice post-infection with *P.chabaudi*. Data represent three separate experiments with at least three mice per group and represent as the mean  $\pm$  SD.

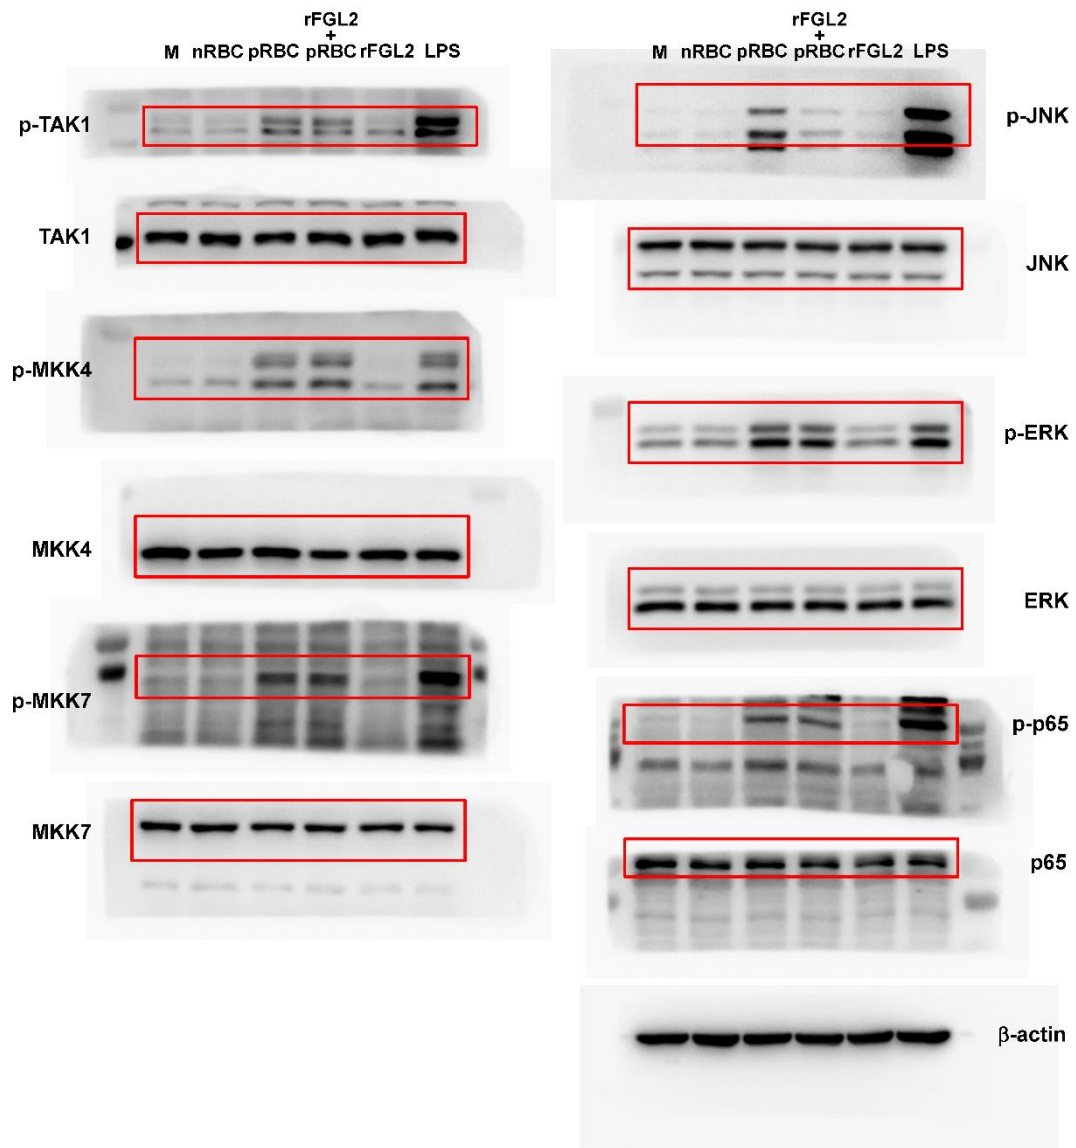

Fig. S5. Full blots of the effect of rFGL2 administration on both mitogen-activated protein kinase and NF- $\kappa$ B activity in *P. chabaudi* lysate-stimulated macrophages by rFGL2. Related to Figure 4.

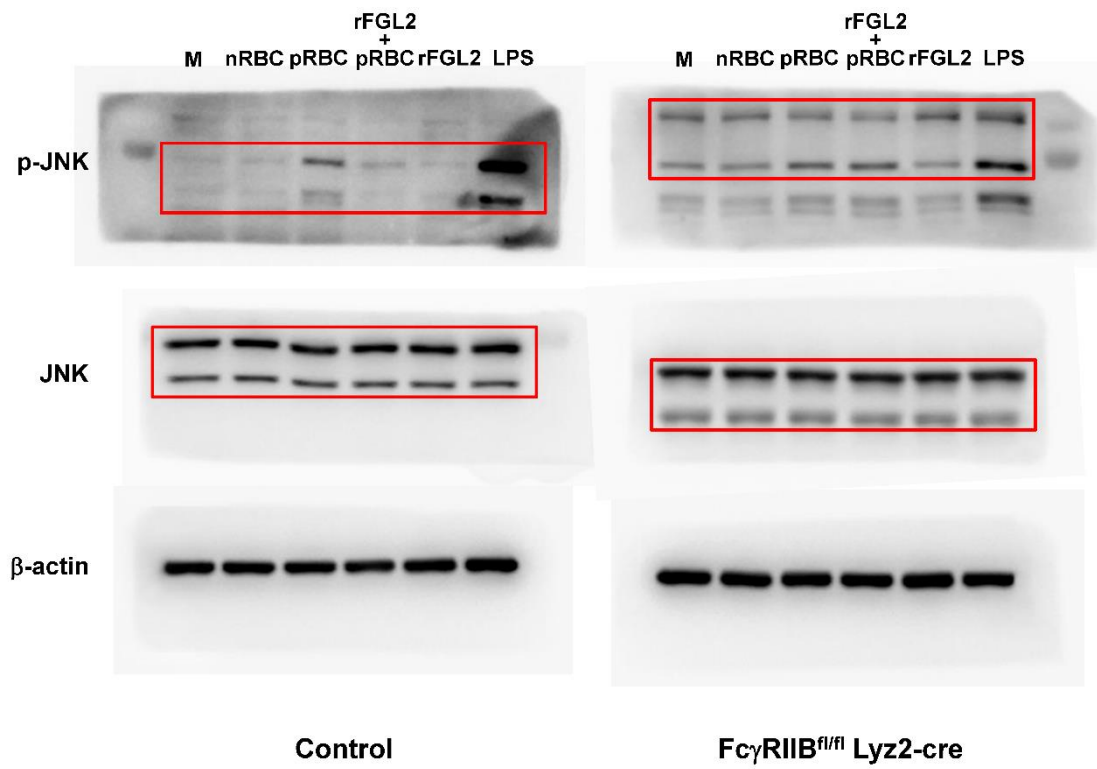

Fig. S6. Full blots of the FcγRIIB-dependent inhibition of JNK in *P. chabaudi* lysate-activated macrophages by sFGL2. Related to Figure 5.



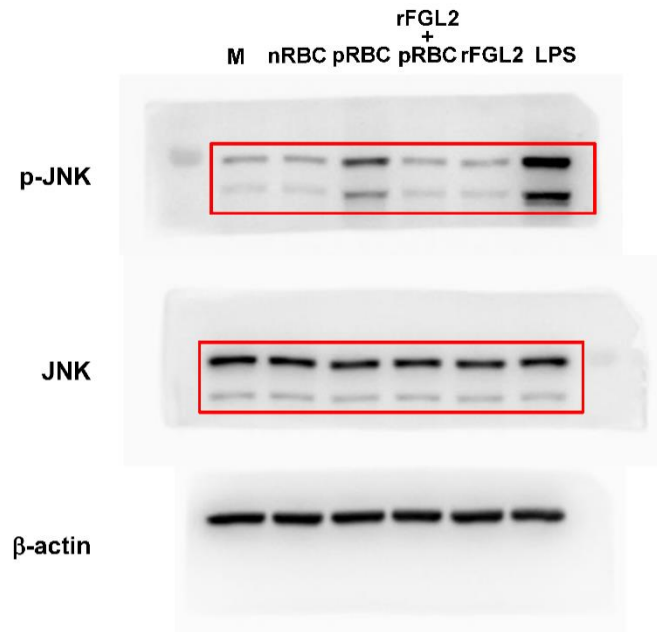

**Fig. S7. Full blots of the inhibition of JNK in *P. falciparum* lysate-activated macrophages by rFGL2. Related to Figure 5.**

**Table S1. Detailed information of patients with malaria.**

| Sample ID <sup>a</sup> | Sex <sup>b</sup> | Age | Axillary temperature | Asexual density | Gametocyte density | Malaria history <sup>c</sup> | Previous malaria date | Previous malaria species | Year | Month |
|------------------------|------------------|-----|----------------------|-----------------|--------------------|------------------------------|-----------------------|--------------------------|------|-------|
| PF4                    | 1                | 20  | 37.8                 | 160             | 0                  | N                            |                       |                          | 2013 | 5     |
| PF5                    | 1                | 25  | 38.4                 | 3880            | 0                  | N                            |                       |                          | 2013 | 5     |
| PF6                    | 1                | 29  | 38                   | 27200           | 0                  | N                            |                       |                          | 2013 | 5     |
| PF7                    | 1                | 47  | 37.1                 | 440             | 0                  | N                            |                       |                          | 2013 | 6     |
| PF8                    | 1                | 33  | 38                   | 9400            | 0                  | N                            |                       |                          | 2013 | 6     |
| PF9                    | 1                | 32  | 37                   | 400             | 0                  | N                            |                       |                          | 2013 | 1     |
| PF10                   | 1                | 19  | 37                   | 0               | 1280               | N                            |                       |                          | 2013 | 2     |
| PF14                   | 1                | 9   | 38.5                 | 9840            | 0                  | N                            |                       |                          | 2013 | 5     |
| PF16                   | 1                | 26  | 38                   | 800             | 0                  | N                            |                       |                          | 2013 | 5     |
| PF17                   | 1                | 33  | 38                   | 1800            | 0                  | N                            |                       |                          | 2013 | 6     |
| PF18                   | 1                | 24  | 38                   | 720             | 0                  | N                            |                       |                          | 2013 | 6     |
| PF19                   | 1                | 20  | 39                   | 20640           | 0                  | N                            |                       |                          | 2013 | 6     |
| PF22                   | 2                | 45  | Unknown              | 840             | 0                  | N                            |                       |                          | 2013 | 6     |
| PF24                   | 2                | 58  | 37.5                 | 800             | 0                  | N                            |                       |                          | 2013 | 6     |
| PF25                   | 1                | 24  | 38                   | 6400            | 0                  | N                            |                       |                          | 2013 | 6     |
| PF26                   | 2                | 25  | 37.5                 | 19520           | 0                  | N                            |                       |                          | 2013 | 6     |
| PF27                   | 2                | 24  | 37.5                 | 40000           | 0                  | N                            |                       |                          | 2013 | 6     |
| PF28                   | 1                | 19  | 40                   | 30400           | 0                  | N                            |                       |                          | 2013 | 6     |
| PF29                   | 1                | 57  | 37                   | 12400           | 0                  | N                            |                       |                          | 2013 | 6     |
| PF36                   | 1                | 12  | 39                   | 15040           | 0                  | N                            |                       |                          | 2013 | 6     |
| PV109                  | 1                | 8   | 36                   | 8680            | 440                | N                            |                       |                          | 2013 | 6     |
| PV112                  | 2                | 7   | 38                   | 240             | 40                 | N                            |                       |                          | 2013 | 6     |
| PV113                  | 1                | 7   | 40                   | 6240            | 520                | N                            |                       |                          | 2013 | 4     |
| PV115                  | 1                | 7   | 40.5                 | 320             | 120                | N                            |                       |                          | 2013 | 4     |
| PV131                  | 1                | 3   | 39                   | 5640            | 200                | N                            |                       |                          | 2013 | 6     |
| PV136                  | 2                | 2   | 38                   | 760             | 0                  | Y                            | 2011/1/1              | PV                       | 2013 | 5     |
| PV141                  | 1                | 15  | 37.1                 | 1280            | 0                  | N                            |                       |                          | 2013 | 6     |
| PV142                  | 2                | 12  | 39.5                 | 1400            | 0                  | N                            |                       |                          | 2013 | 6     |
| PV143                  | 1                | 7   | 39.2                 | 1240            | 0                  | N                            |                       |                          | 2013 | 6     |
| PV150                  | 1                | 11  | 38.5                 | 1640            | 360                | Y                            | 2012/6/1              | PV                       | 2013 | 6     |
| PV151                  | 1                | 12  | 40.4                 | 840             | 0                  | N                            |                       |                          | 2013 | 6     |
| PV155                  | 2                | 13  | 41                   | 320             | 240                | N                            |                       |                          | 2013 | 7     |
| PV2                    | 1                | 6   | 37                   | 0               | 16                 | N                            |                       |                          | 2015 | 6     |
| PV6                    | 2                | 18  | 40                   | 3960            | 80                 | N                            |                       |                          | 2015 | 6     |
| PV10                   | 2                | 18  | 38.5                 | 23680           | 1480               | N                            |                       |                          | 2015 | 6     |
| PV11                   | 1                | 5   | 37                   | 928             | 192                | N                            |                       |                          | 2015 | 6     |
| PV15                   | 1                | 32  | 37.6                 | 48000           | 1800               | N                            |                       |                          | 2015 | 6     |

|       |   |    |      |       |      |   |      |    |
|-------|---|----|------|-------|------|---|------|----|
| PV17  | 2 | 20 | 37   | 18440 | 720  | N | 2015 | 6  |
| PV18  | 2 | 19 | 37.8 | 11560 | 560  | N | 2015 | 6  |
| PV29  | 2 | 13 | 37   | 12080 | 320  | N | 2015 | 6  |
| PV34  | 2 | 20 | 37   | 10000 | 2040 | N | 2015 | 6  |
| PV35  | 2 | 7  | 39.5 | 4080  | 600  | N | 2015 | 6  |
| PV39  | 2 | 6  | 37   | 736   | 80   | N | 2015 | 6  |
| PV477 | 1 | 3  | 36   | 11200 | 2280 | N | 2015 | 7  |
| PV76  | 1 | 10 | 38.5 | 3600  | 200  | N | 2015 | 7  |
| PV155 | 2 | 16 | 38.5 | 5640  | 3120 | N | 2015 | 6  |
| PV244 | 2 | 30 | 38.5 | 768   | 608  | N | 2015 | 10 |
| PV249 | 2 | 35 | 38   | 4400  | 1600 | N | 2015 | 9  |
| PV254 | 2 | 13 | 39.5 | 320   | 0    | N | 2015 | 9  |
| PV276 | 2 | 37 | 38   | 1088  | 32   | N | 2015 | 11 |
| PV279 | 1 | 11 | 39.5 | 912   | 240  | N | 2015 | 11 |
| PV315 | 1 | 57 | 39.5 | 3920  | 160  | Y | 2015 | 11 |
| PV322 | 1 | 34 | 39.1 | 1280  | 448  | N | 2015 | 11 |
| PV420 | 2 | 33 | 37   | 640   | 800  | N | 2015 | 4  |
| PV422 | 2 | 20 | 38   | 16400 | 0    | N | 2015 | 5  |
| PV423 | 1 | 11 | 39.8 | 4400  | 1200 | N | 2015 | 4  |
| PV426 | 2 | 18 | 37   | 7920  | 1320 | N | 2015 | 4  |
| PV431 | 1 | 62 | 39.1 | 19920 | 1560 | N | 2015 | 3  |
| PV434 | 1 | 19 | 38   | 20400 | 1560 | N | 2015 | 5  |
| PV436 | 2 | 9  | 36   | 480   | 896  | N | 2015 | 4  |
| PV444 | 2 | 12 | 39   | 10520 | 200  | N | 2015 | 4  |
| PV445 | 1 | 18 | 39   | 13800 | 200  | N | 2015 | 5  |
| PV464 | 1 | 33 | 40   | 7600  | 5000 | N | 2015 | 5  |
| PV475 | 2 | 12 | 36.6 | 23920 | 360  | N | 2015 | 5  |

<sup>a</sup> PF, *Plasmodium falciparum*; PV, *Plasmodium vivax*.

<sup>b</sup> 1, male; 2, female.

<sup>c</sup> Y, yes; N, no.
